# Supplementary material for: Novel stretchable thermochromic transparent heaters designed for smart window defroster applications by spray coating silver nanowire
Source: Royal Society of Chemistry journal article supplement (doi:10.1039/c9ra06508c), 2019-01-01
Supplement: c9ra06508c1.pdf [file c9ra06508c1.pdf]

## *Supporting Information*

### **Novel Stretchable Thermochromic Transparent Heaters Designed for Smart Windows Defrosters Applications by Spray Coating Silver Nanowire**

Loganathan Veeramuthu,<sup>a,+</sup> Bo-Yu Chen,<sup>a,+</sup> Ching-Yi Tsai,<sup>a,+</sup> Fang-Cheng Liang,<sup>a,+</sup> Manikandan  
venkatesan,<sup>a</sup> Dai-Hua Jiang,<sup>a</sup> Chin-Wen Chen,<sup>a</sup> Xingke Cai,<sup>b,\*</sup> and Chi-Ching Kuo,<sup>a,\*</sup>

<sup>a</sup> Institute of Organic and Polymeric Materials, Research and Development Center of Smart  
Textile Technology, National Taipei University of Technology, 10608 Taipei, Taiwan.

<sup>b</sup> Institute for Advanced Study, Shenzhen University, Shenzhen Guangdong 518060, P. R. China

<sup>+</sup> L. Veeramuthu, B.-Y. Chen, C.-Y. Tsai, and F.-C. Liang contributed equally to this work

\*Author to whom all correspondence should be addressed

Tel: 886-2-27712171\*2407 Fax: 886-2-27317174

Correspondence to: \*Prof. C.-C. Kuo [kuocc@mail.ntut.edu.tw](mailto:kuocc@mail.ntut.edu.tw)

\*Prof. X. Cai [cai.xingke@szu.edu.cn](mailto:cai.xingke@szu.edu.cn)

Table S1. Temperature decay of the thermochromic ink and silver nanowire-coated polydimethylsiloxane device

| S.No | Voltage (V) | Temperature °C (0% stretch) | Temperature °C (30% stretch) | Temperature Decay % (30%) |
|------|-------------|-----------------------------|------------------------------|---------------------------|
| 1    | 2           | 29                          | 29                           | 0%                        |
| 2    | 5           | 53                          | 44                           | 17%                       |
| 3    | 10          | 110                         | 68                           | 38%                       |

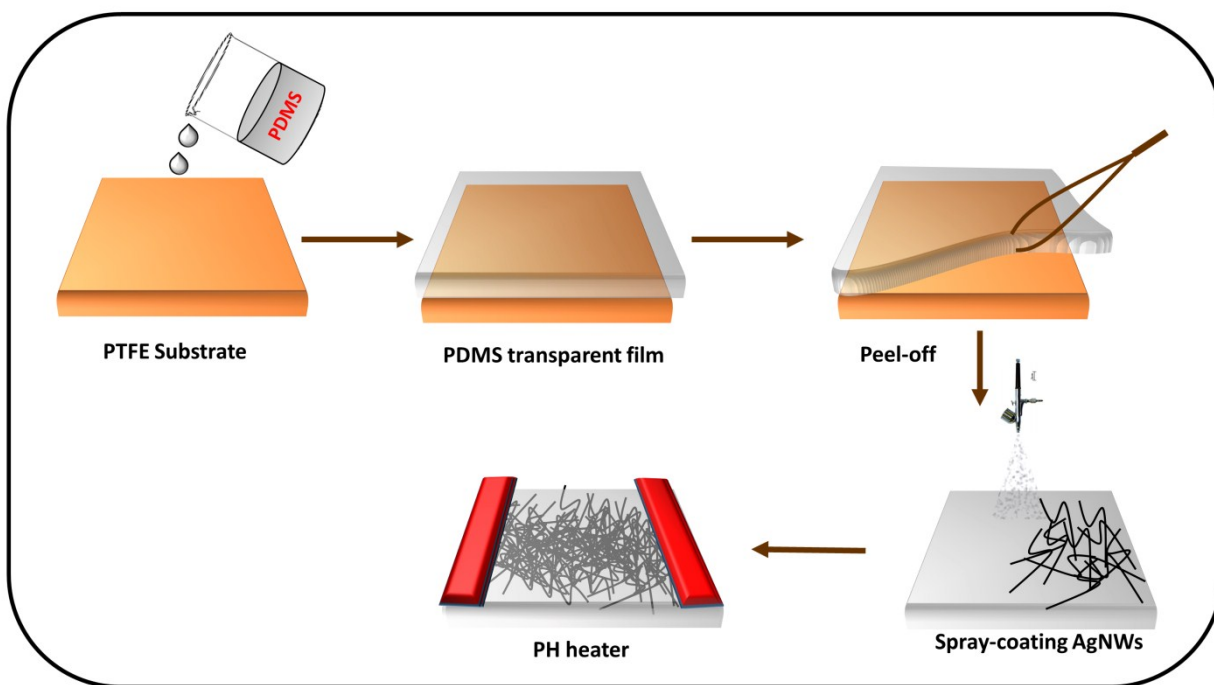

Figure S1. Scheme representing the fabrication of a PH heater (AgNW-coated polydimethylsiloxane [PDMS]) through the drop-casting process and spray-coating technique.

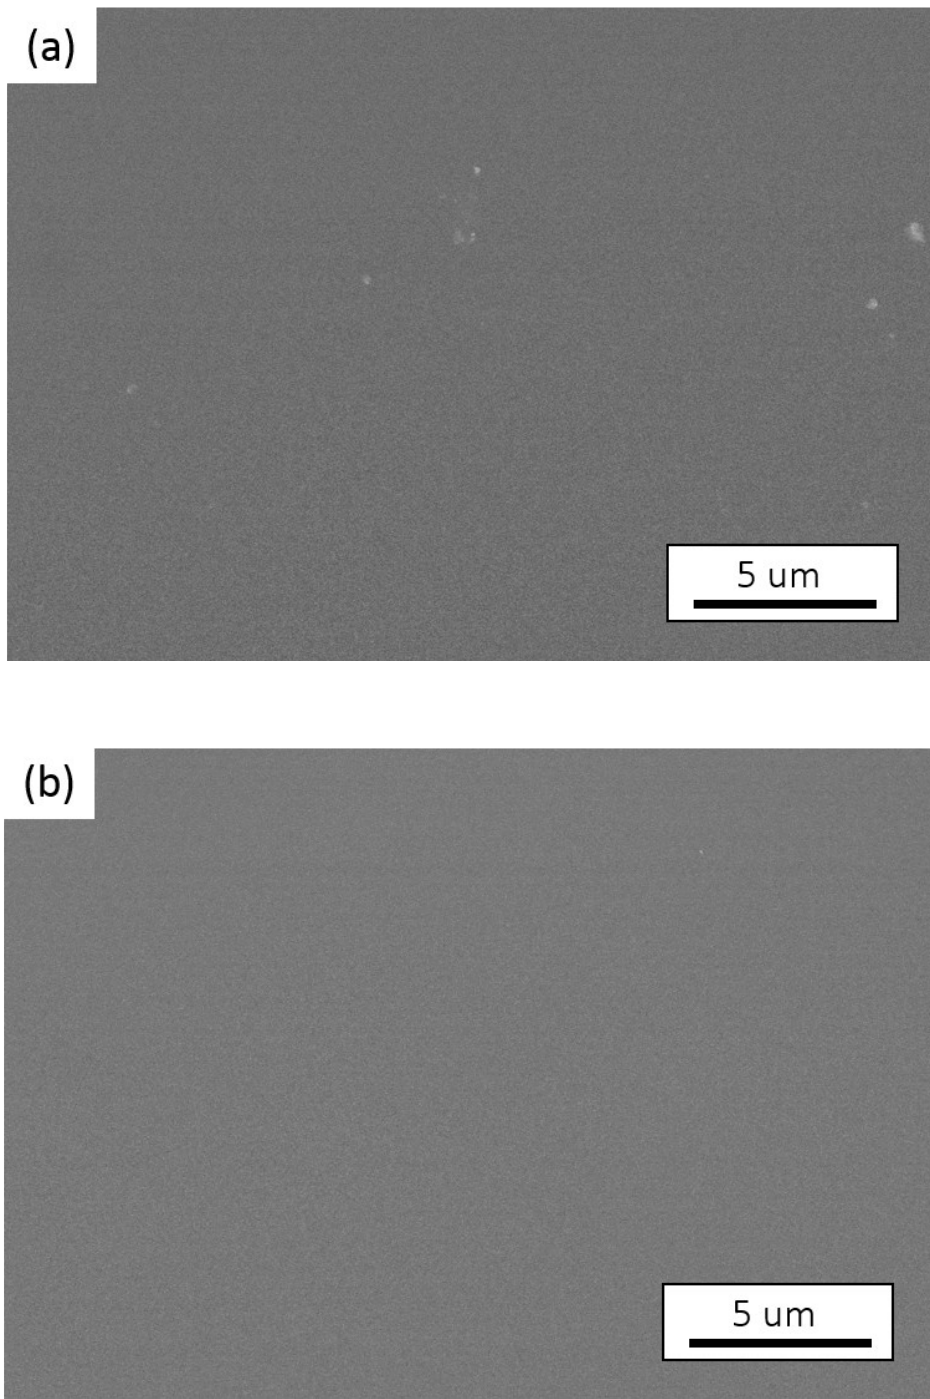

Figure S2. Top-view FE-SEM image of (a) pristine polydimethylsiloxane (PDMS) and (b) thermochromic ink-blended PDMS film

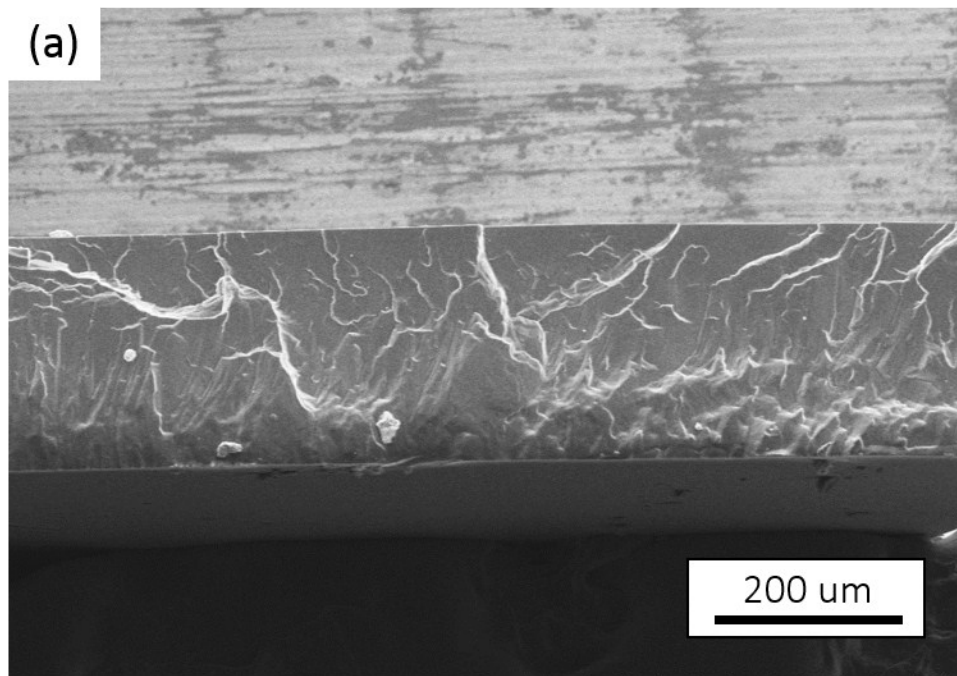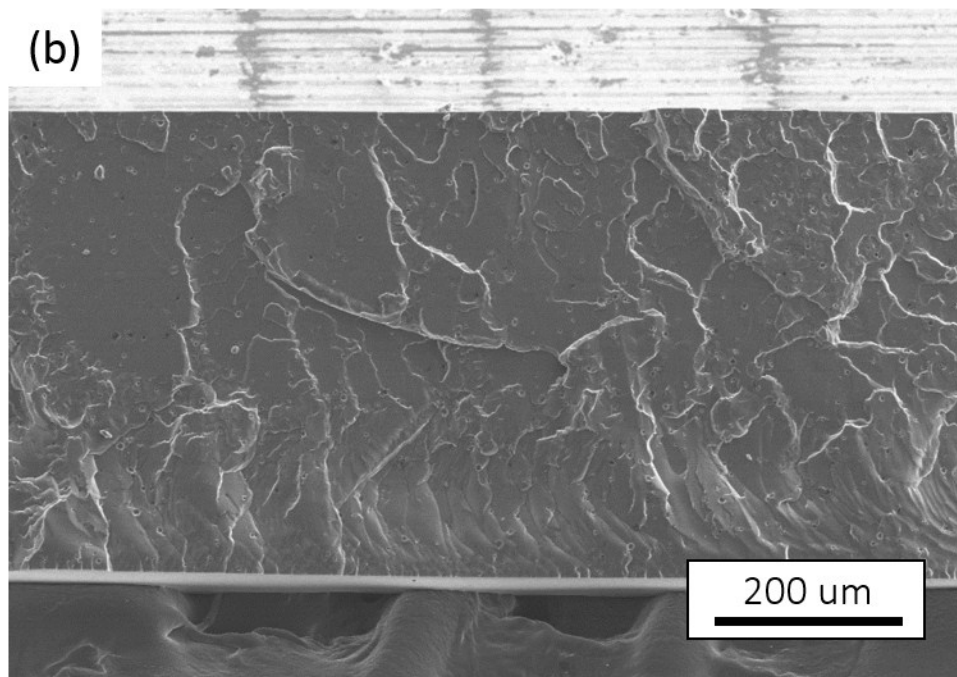

Figure S3. Cross-sectional FE-SEM images of (a) pure polydimethylsiloxane (PDMS) and (b) thermochromic ink-blended PDMS

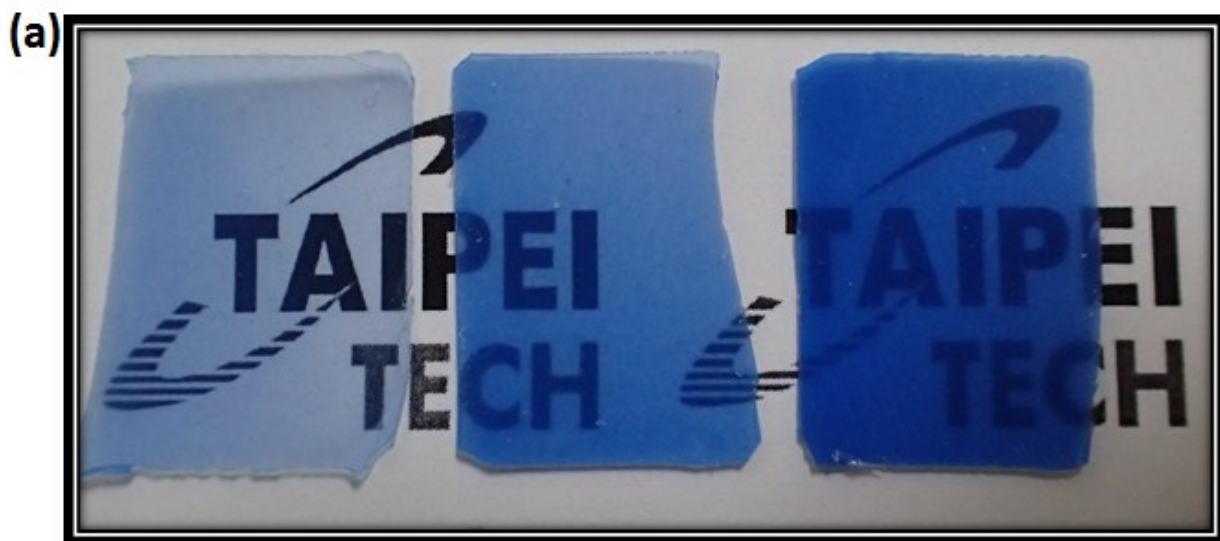

Figure S4. Photographs of variegated weight ratios for thermochromic ink blended with polydimethylsiloxane

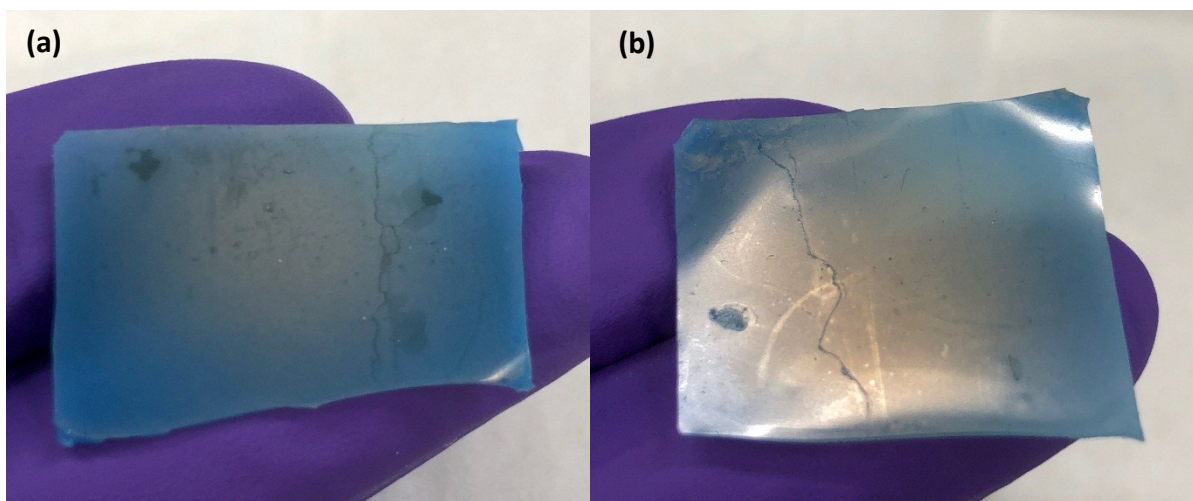

Figure S5. Observed cracks on 30-s and 60-s spray-coated devices after stretching



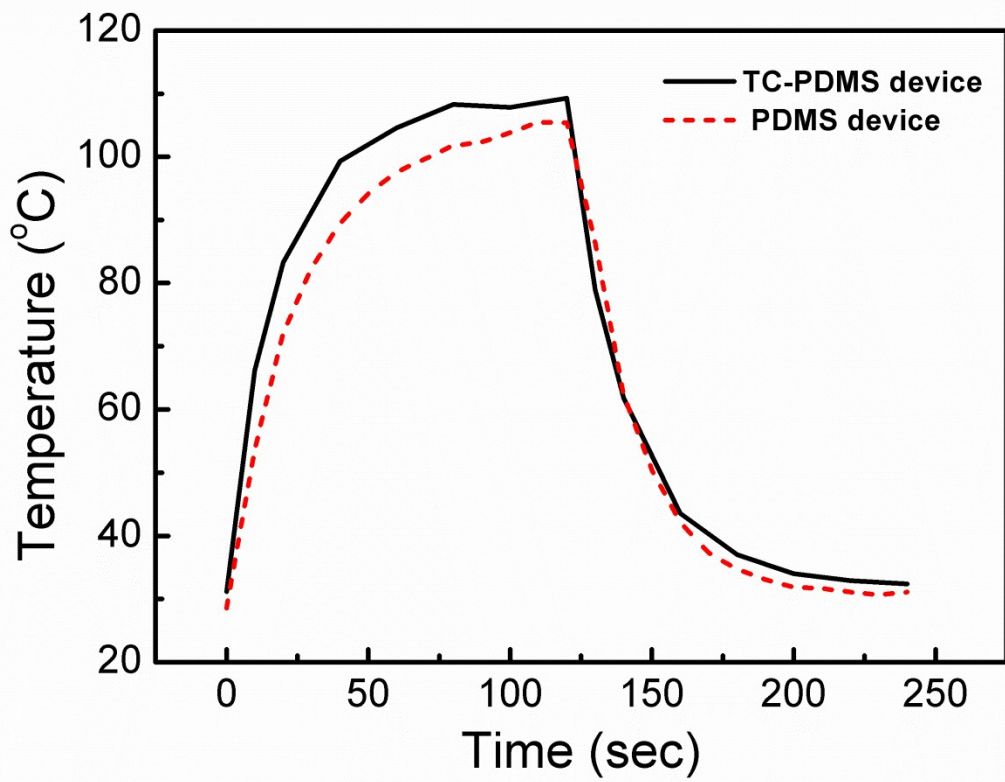

Figure S6. Heating performance comparison b/w the PDMS and TC-PDMS based device.

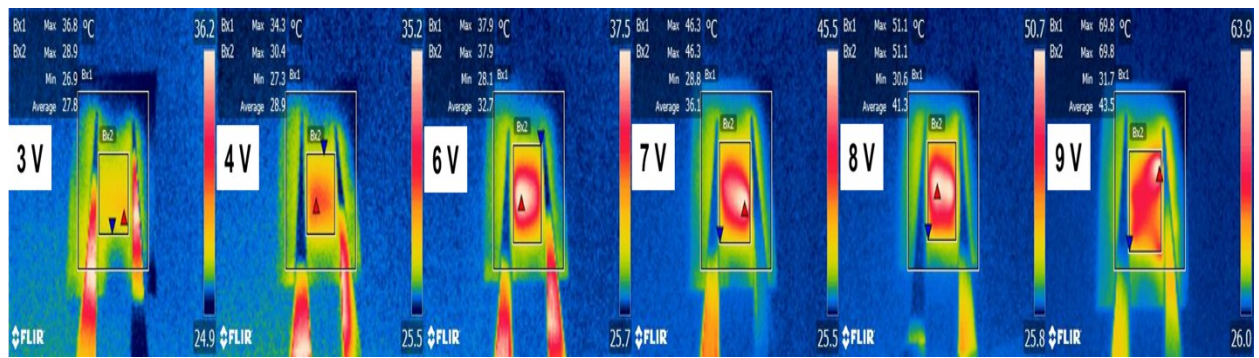

Figure S7. IR camera image of PBH device subject to various biases.

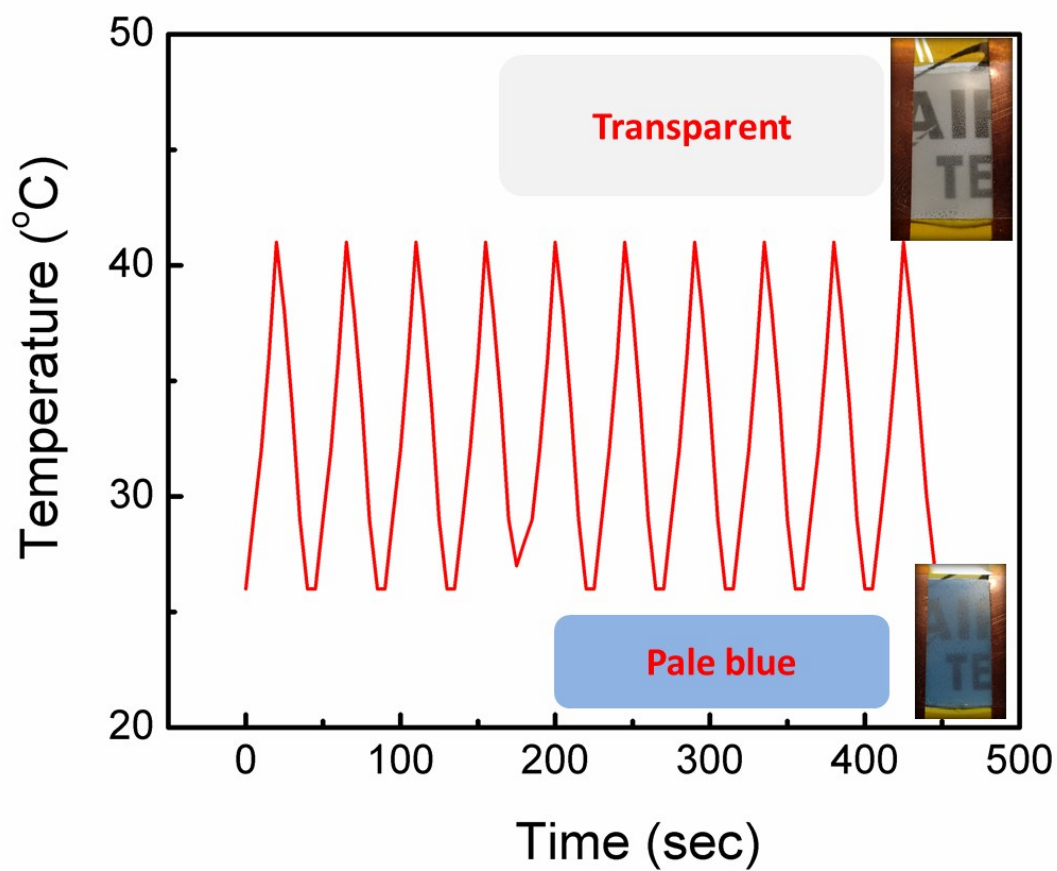

Figure S8. Reversibility test carried out with the PBH device 10 repetitive cycles featuring the unique thermochromic behavior.
